# Supplementary material for: Autonomous methane seep site monitoring offshore Western Svalbard: Hourly to seasonal variability and associated oceanographic parameters
Source: Copernicus journal article supplement (doi:10.5194/os-2021-85), 2021-09-13
Supplement: Supplementary file [file os-2021-85-AC2-supplement.pdf]

# CONTROS HydroC™ CH<sub>4</sub>

Selectivity

4 JENA  
ENGINEERING

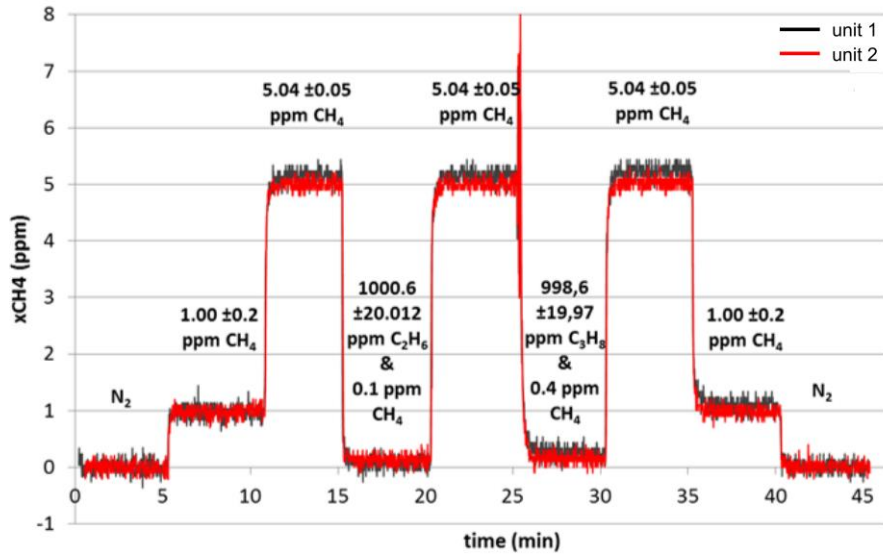

Figure R1: Selectivity of the TDLAS detector from lab test at 4h-Jena engineering

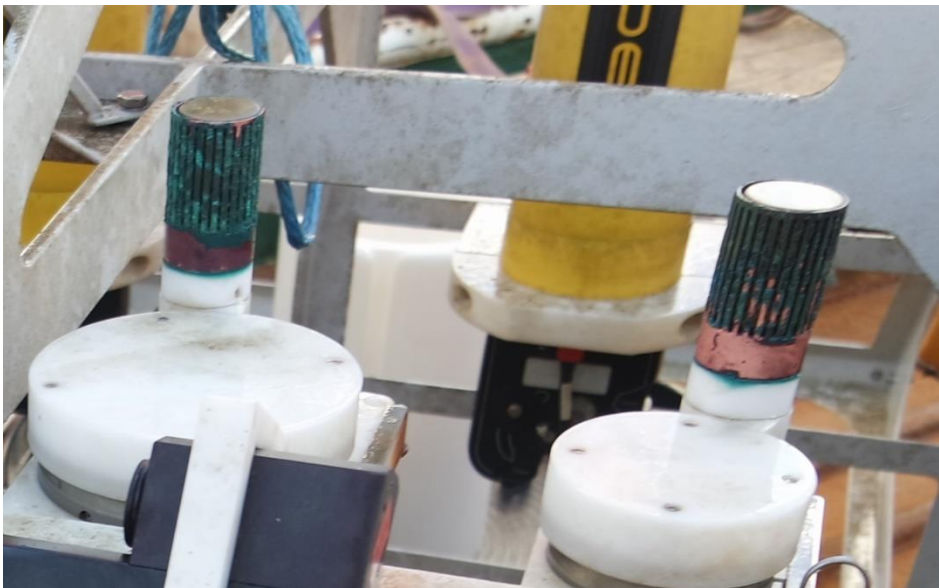

Figure R2: Filter and pump intake for the two CONTROS sensors from O246 directly after retrieval.

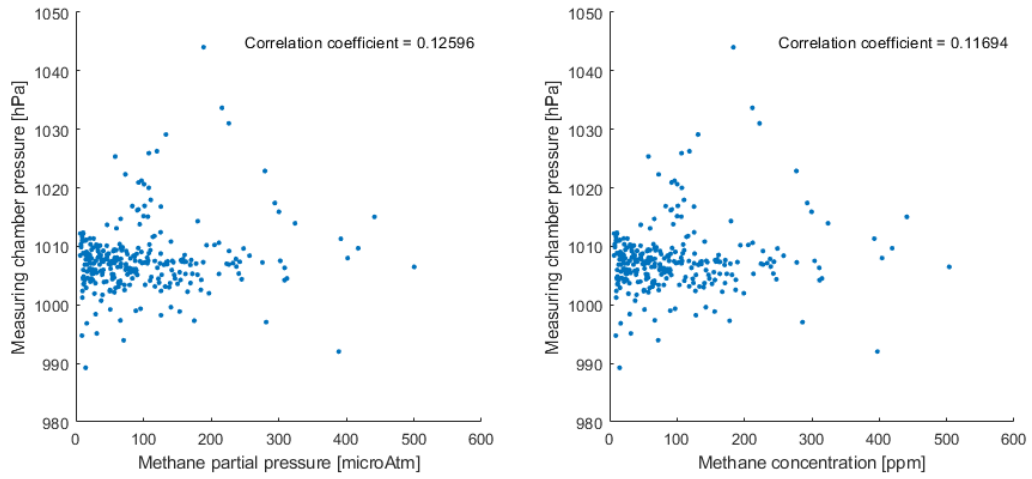

Figure R3: Pressure in the measuring chamber of the two sensors, i.e. O91 (left) and O246 (right). Only one datapoint is used for each measurement period to avoid effects of autocorrelation (due to the uneven sampling scheme).
