# Supplementary material for: Autonomous methane seep site monitoring offshore Western Svalbard: Hourly to seasonal variability and associated oceanographic parameters
Source: Copernicus journal article supplement (doi:10.5194/os-2021-85), 2021-09-13

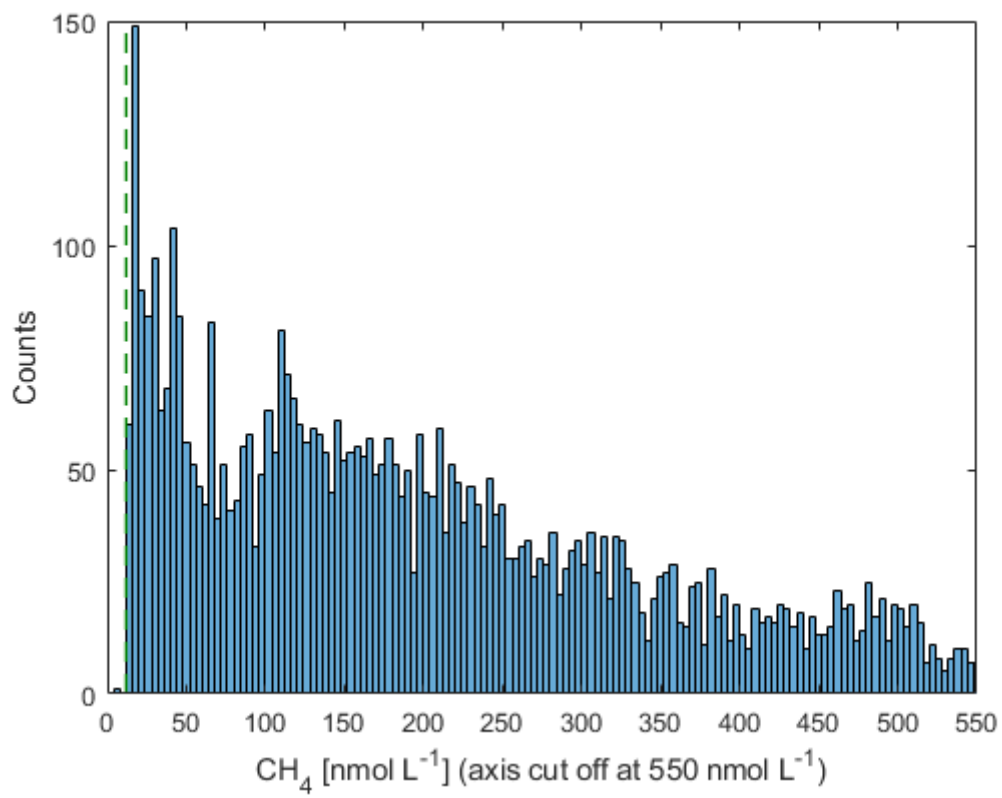

Supplement: Supplementary file [file os-2021-85-AC3-supplement.pdf]
